# Supplementary material for: Using low-risk factors to generate non-integrated human induced pluripotent stem cells from urine-derived cells
Source: PubMed Central journal article supplement (PMC5667457; doi:10.1186/s13287-017-0698-8), 2017-11-02

Fig.S5

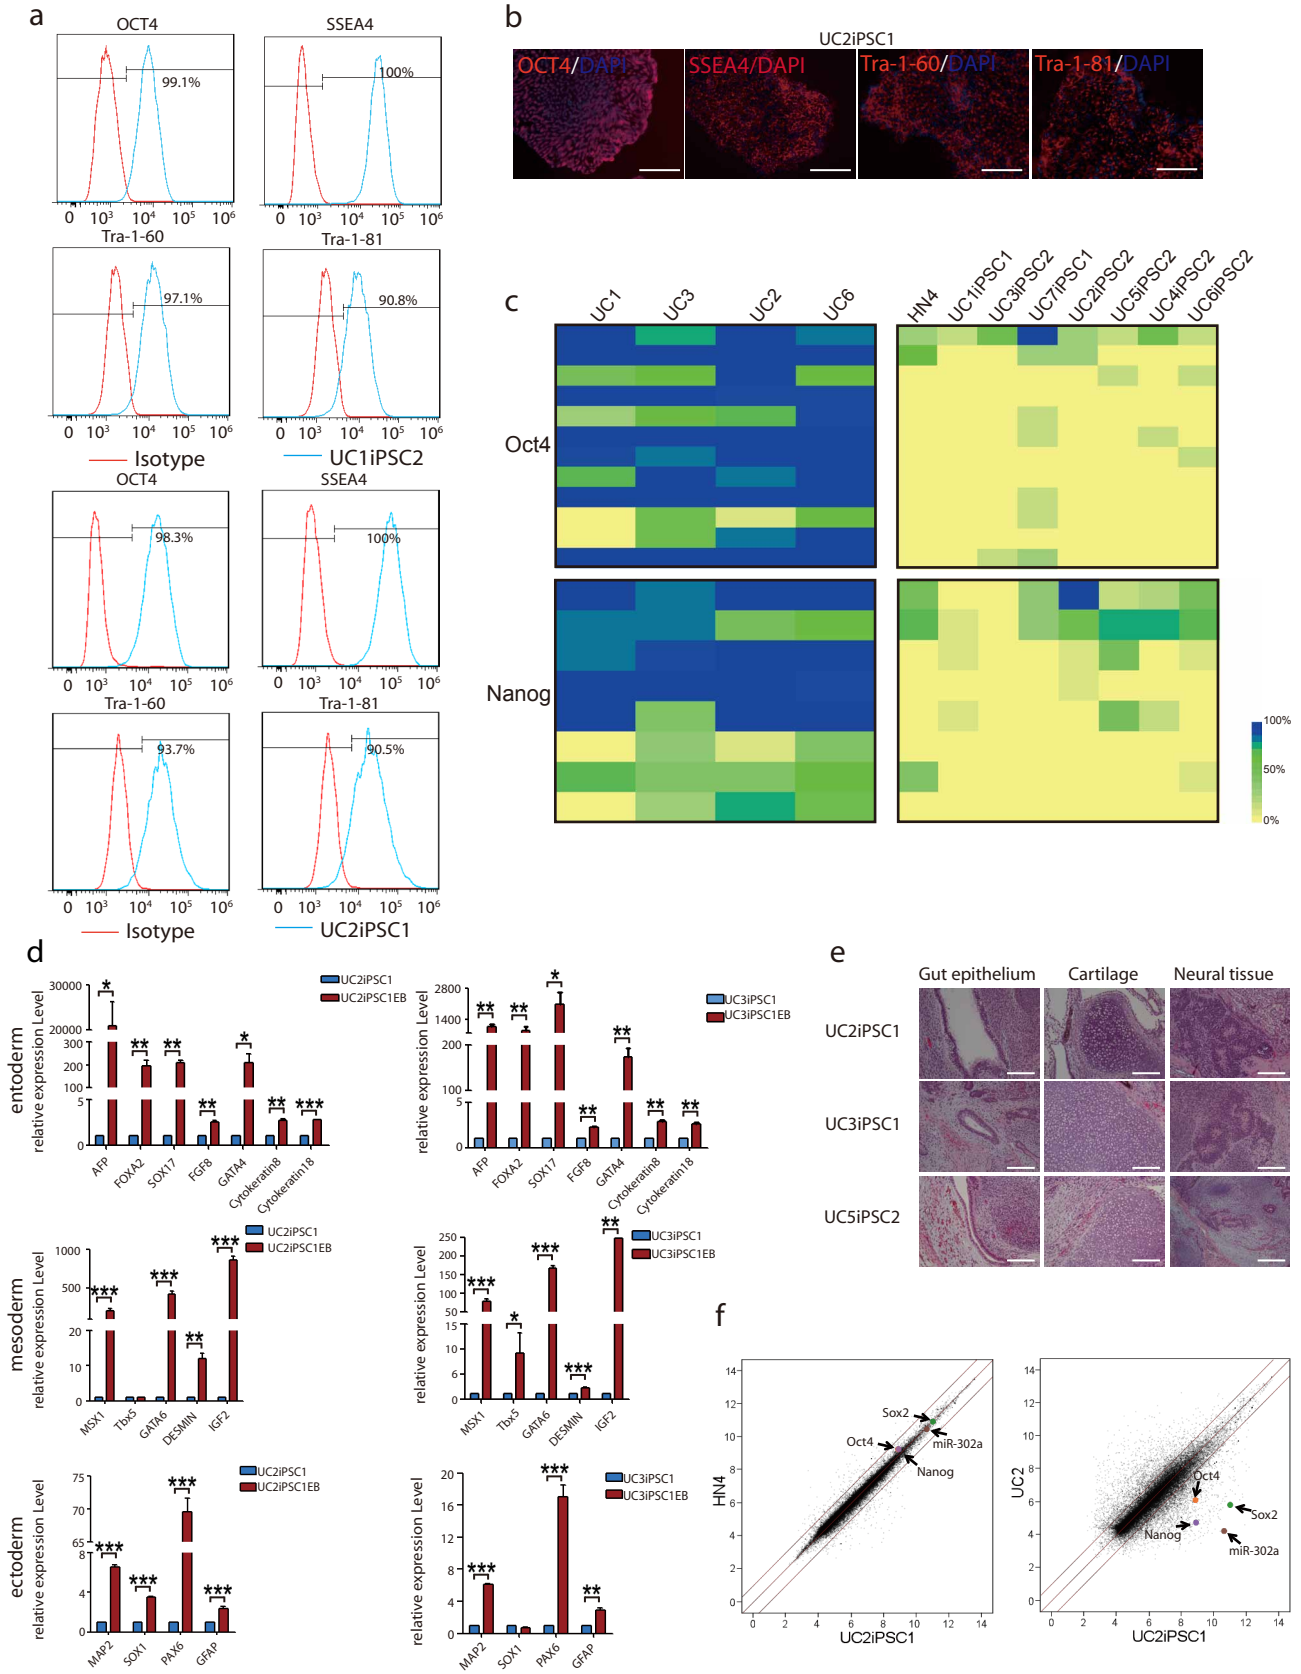

Supplement: 13287_2017_698_MOESM8_ESM.pdf [file 13287_2017_698_MOESM8_ESM.pdf]
